# Supplementary material for: Effectiveness of premixed insulin to achieve glycaemic control in type 2 diabetes: A retrospective UK cohort study
Source: PubMed Central journal article supplement — Diabetes Obes Metab. 2021 Jan 26;23(4):929–37. doi: 10.1111/dom.14298 (PMC8048616; doi:10.1111/dom.14298), 2021-01-26
Supplement: DOM-23-929-s001.pdf [file DOM-23-929-s001.pdf]

# Effectiveness of premixed insulin to achieve glycaemic control in type 2 diabetes: a retrospective UK cohort study

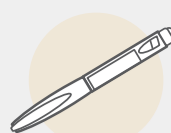

## Authors:

E. B. Jude, MD<sup>1</sup>, C. Trescoli, MD<sup>2</sup>, R. Emral, MD<sup>3</sup>, A. Ali, MD<sup>4</sup>, R. Lubwama, DDS<sup>5</sup>, K. Palmer, BSc<sup>6</sup>, A. Shaunik, MD<sup>7</sup>, N. Nanda, MBBS<sup>8</sup>, P. Raskin, MD<sup>9</sup>, F. Gomez-Peratta, MD<sup>9</sup>

## Affiliations:

<sup>1</sup>Tameside and Glossop Integrated Care NHS Foundation Trust, Ashton-under-Lyne, UK; <sup>2</sup>Hospital Universitario de La Ribera, Alzira, Spain; <sup>3</sup>Department of Endocrinology and Metabolic Diseases, Ankara University, Faculty of Medicine, Ankara, Turkey; <sup>4</sup>Oakenhurst Medical Practice, Blackburn, UK; <sup>5</sup>Sanofi, Bridgewater, NJ, USA; <sup>6</sup>Sanofi, Reading, UK; <sup>7</sup>Farnham Road Practice, Slough, UK; <sup>8</sup>Department of Medicine, University of Texas Southwestern Medical Center, Dallas, TX, USA; <sup>9</sup>Endocrinology and Nutrition Unit, Segovia General Hospital, Segovia, Spain

<sup>1</sup>At time the study was conducted. Current affiliation: CSL Behring, King of Prussia, PA, USA

Introduction

Study design

Key results

Conclusion

## Introduction

For people with T2D inadequately controlled with one or two OAD(s), UK NICE guidelines recommend the following:

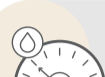

**HbA<sub>1c</sub> ≥7.5 %** (≥58 mmol/mol)

Switch to insulin-based treatment

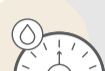

**HbA<sub>1c</sub> ≥9 %** (≥75 mmol/mol)

Premixed insulin is an option

## Objective

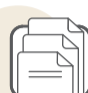

To investigate the real-world effectiveness of premix regimens for achieving glycaemic control in routine clinical practice in the UK

## Study design

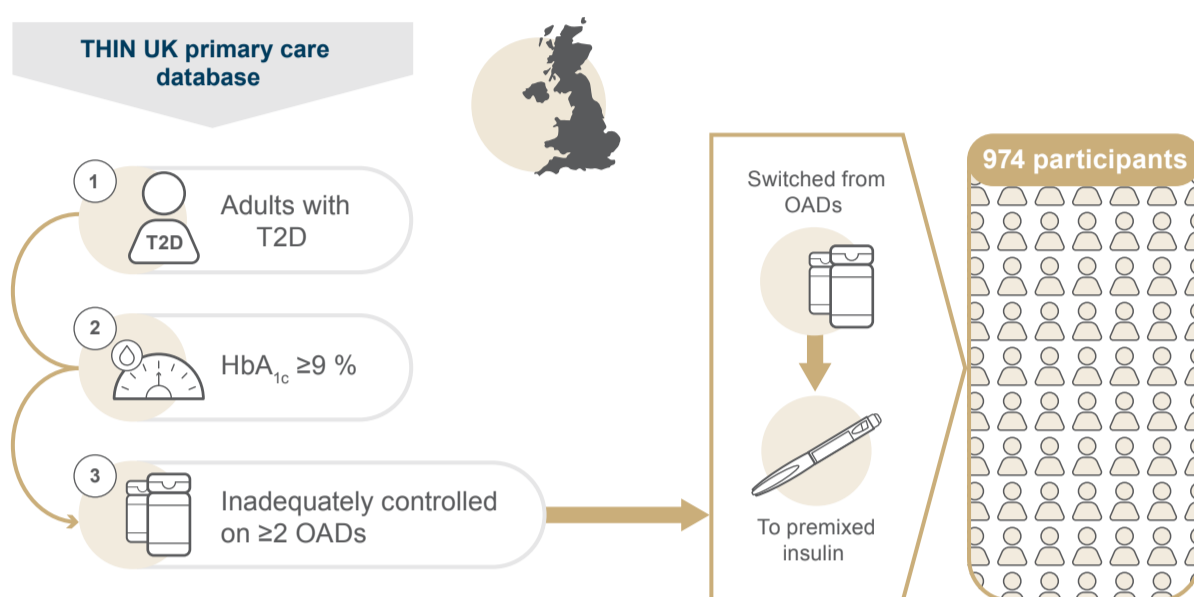

### Primary objective

The primary objective of the study was to investigate the real-world effectiveness of premixed insulin, assessed as the probability of reaching glycaemic control

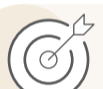

**HbA<sub>1c</sub> <7.5 %**  
(<58.5 mmol/mol)

### Sensitivity analysis

The incidence of reaching glycaemic control (HbA<sub>1c</sub> <7.5 %), and the mean change in HbA<sub>1c</sub>, all over 24 months post-premixed insulin initiation

## Key results

### Glycaemic control

Probability of achieving glycaemic control (HbA<sub>1c</sub> <7.5 %) following premix initiation:

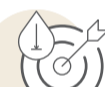

Was low (<20%)

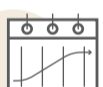

Was highest at 3–6 months (18.2%)

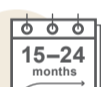

Plateaued after 15–24 months

Incidence of achieving (HbA<sub>1c</sub> <7.5 %) or improving (≥1 % and ≥2 % HbA<sub>1c</sub> decrease from baseline) glycaemic control following premix initiation

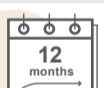

Plateaued after 12 months

## Associations between baseline characteristics and incidence of glycaemic control achievement or improvement

|                                                        | Achieving glycaemic control |             |
|--------------------------------------------------------|-----------------------------|-------------|
|                                                        | Less likely                 | More likely |
| <b>HbA<sub>1c</sub> &lt;7.5 %</b>                      |                             |             |
| Baseline HbA <sub>1c</sub> 9–10 % (ref >11 %)          | ○                           | ●           |
| <b>≥1 % HbA<sub>1c</sub> decrease from baseline</b>    |                             |             |
| Age 45–54 years (ref >75 years)                        | ●                           | ○           |
| Baseline HbA <sub>1c</sub> 9–10 % (ref >11 %)          | ●                           | ○           |
| Stroke during baseline period                          | ○                           | ●           |
| <b>≥2 % HbA<sub>1c</sub> decrease from baseline</b>    |                             |             |
| BMI >40 kg/m <sup>2</sup> (ref <25 kg/m <sup>2</sup> ) | ●                           | ○           |
| Baseline HbA <sub>1c</sub> 9–10 % (ref >11 %)          | ●                           | ○           |
| Baseline HbA <sub>1c</sub> >10–11 % (ref >11 %)        | ●                           | ○           |
| Nephropathy during baseline period                     | ○                           | ●           |
| Peripheral vascular disease during baseline period     | ●                           | ○           |

## Conclusion

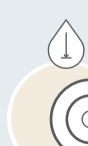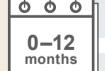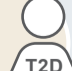

The incidence of achieving glycaemic targets on premix was low at 6 months, with little additional benefit beyond 6 months, with little additional uncontrolled T2D (HbA<sub>1c</sub> ≥9 %) who initiated premixed insulin as per NICE recommendations. This suggests a high unmet need for early, timely treatment changes with more effective, simpler therapies in these patients

## Abbreviations

BMI, body mass index; HbA<sub>1c</sub>, glycated haemoglobin; NICE, National Institute for Health Care and Excellence; OADs, oral antihyperglycaemic drugs; THIN, The Health Improvement Network; T2D, type 2 diabetes; UK, United Kingdom

This article presents the opinions of the authors. For a full list of declarations, including funding and author disclosure statements, please see the full text online. [Full manuscript](#)
